# Supplementary material for: Studies on the Role of Compartmentalized Profiles of Cytokines in the Risk of Hepatocellular Carcinoma
Source: MDPI journal article supplement (doi:10.3390/ijms241713432), 2023-08-30
Supplement: s1 [file s1]

**Table S1.** Univariate logistic regression predicting hepatocellular carcinoma (HCC) risk

|                                      | <b>Youden cutoff</b> | <b>without HCC</b> | <b>with HCC</b> | <b>OR (95%CI)</b>   | <b>P value*</b> |
|--------------------------------------|----------------------|--------------------|-----------------|---------------------|-----------------|
| <b>Ascites</b>                       |                      |                    |                 |                     |                 |
| <b>IL-1<math>\beta</math></b>        | 0                    | 6                  | 14              | 7 (1.59, 30.8)      | 0.046           |
|                                      | > 0                  | 12                 | 4               |                     |                 |
| <b>IL-2</b>                          | < 36.64              | 6                  | 15              | 10 (2.06, 48.56)    | 0.032           |
|                                      | $\geq$ 36.64         | 12                 | 3               |                     |                 |
| <b>IL-5</b>                          | < 15.68              | 6                  | 15              | 10 (2.06, 48.56)    | 0.032           |
|                                      | $\geq$ 15.68         | 12                 | 3               |                     |                 |
| <b>IL-7</b>                          | < 0.63               | 4                  | 13              | 9.1 (2, 41.45)      | 0.032           |
|                                      | $\geq$ 0.63          | 14                 | 5               |                     |                 |
| <b>IL-13</b>                         | < 0.35               | 4                  | 14              | 12.25 (2.54, 58.97) | 0.028           |
|                                      | $\geq$ 0.35          | 14                 | 4               |                     |                 |
| <b>IL-15</b>                         | < 10.64              | 4                  | 12              | 7 (1.59, 30.8)      | 0.046           |
|                                      | $\geq$ 10.64         | 14                 | 6               |                     |                 |
| <b>IL-17A</b>                        | < 0.56               | 3                  | 12              | 10 (2.06, 48.56)    | 0.032           |
|                                      | $\geq$ 0.56          | 15                 | 6               |                     |                 |
| <b>IL-23</b>                         | 0                    | 8                  | 14              | 7.58 (1.65, 34.9)   | 0.046           |
|                                      | > 0                  | 13                 | 3               |                     |                 |
| <b>IFN-<math>\alpha</math></b>       | < 0.06               | 3                  | 13              | 13 (2.59, 65.2)     | 0.028           |
|                                      | $\geq$ 0.06          | 15                 | 5               |                     |                 |
| <b>IFN-<math>\gamma</math></b>       | 0                    | 2                  | 12              | 16 (2.73, 93.62)    | 0.028           |
|                                      | > 0                  | 16                 | 6               |                     |                 |
| <b>GM-CSF</b>                        | < 20.68              | 5                  | 13              | 6.76 (1.57, 29.07)  | 0.046           |
|                                      | $\geq$ 20.68         | 13                 | 5               |                     |                 |
| <b>Plasma</b>                        |                      |                    |                 |                     |                 |
| <b>IL-1<math>\beta</math></b>        | < 1.33               | 3                  | 11              | 7.33 (1.58, 33.97)  | 0.046           |
|                                      | $\geq$ 1.33          | 16                 | 8               |                     |                 |
| <b>IL-2</b>                          | < 8.39               | 3                  | 12              | 9.14 (1.95, 42.9)   | 0.032           |
|                                      | $\geq$ 8.39          | 16                 | 7               |                     |                 |
| <b>IL-4</b>                          | < 10.34              | 5                  | 13              | 6.07 (1.49, 24.76)  | 0.046           |
|                                      | $\geq$ 10.34         | 14                 | 6               |                     |                 |
| <b>IL-5</b>                          | 0                    | 8                  | 17              | 11.69 (2.08, 65.61) | 0.032           |
|                                      | > 0                  | 11                 | 2               |                     |                 |
| <b>IL-15</b>                         | < 11.56              | 3                  | 15              | 20 (3.82, 104.6)    | 0.008           |
|                                      | $\geq$ 11.56         | 16                 | 4               |                     |                 |
| <b>IL-17A</b>                        | 0                    | 3                  | 12              | 9.14 (1.95, 42.9)   | 0.032           |
|                                      | > 0                  | 16                 | 7               |                     |                 |
| <b>TNF-<math>\alpha</math></b>       | < 4.72               | 3                  | 11              | 7.33 (1.58, 33.97)  | 0.046           |
|                                      | $\geq$ 4.72          | 16                 | 8               |                     |                 |
| <b>IFN-<math>\alpha</math></b>       | 0                    | 4                  | 14              | 10.5 (2.34, 47.2)   | 0.028           |
|                                      | > 0                  | 15                 | 5               |                     |                 |
| <b>MIP-1<math>\alpha</math>/CCL3</b> | < 13.94              | 3                  | 11              | 7.33 (1.58, 33.97)  | 0.046           |
|                                      | $\geq$ 13.94         | 16                 | 8               |                     |                 |
| <b>GM-CSF</b>                        | < 6.94               | 2                  | 12              | 14.57 (2.57, 82.73) | 0.028           |
|                                      | $\geq$ 6.94          | 17                 | 7               |                     |                 |
| <b>LIF</b>                           | < 7.76               | 6                  | 14              | 6.07 (1.49, 24.76)  | 0.046           |
|                                      | $\geq$ 7.76          | 13                 | 5               |                     |                 |

\*The Benjamini-Hochberg multiple test correction was applied.

**Table S2.** Cytokine distribution in the two compartments in 24 cirrhotic patients without HCV/HBV infection

|                                      | Ascites                    | Plasma                  | Total                   | <i>P value*</i> |
|--------------------------------------|----------------------------|-------------------------|-------------------------|-----------------|
| <b>Interleukins, TNF and IFN</b>     |                            |                         |                         |                 |
| <b>IL-1Ra</b>                        | 25.34 (0, 147.51)          | 364.25 (159.52, 696.16) | 147.51 (25.34, 425.09)  | 0.001           |
| <b>IL-2</b>                          | 34.64 (27.69, 58.69)       | 11.54 (6.83, 16.41)     | 27 (12.19, 43.17)       | 0.0001          |
| <b>IL-4</b>                          | 96.62 (87.72, 118.13)      | 8.69 (4.78, 22.83)      | 66.32 (9.89, 101.27)    | 0.0000          |
| <b>IL-5</b>                          | 16.04 (6.93, 34.61)        | 0 (0, 4.16)             | 6.93 (0, 19.44)         | 0.002           |
| <b>IL-6</b>                          | 2403.61 (1656.98, 4129.58) | 41.51 (22.46, 71.31)    | 517.6 (41.89, 2403.61)  | 0.0000          |
| <b>IL-10</b>                         | 21.53 (9.54, 31.56)        | 1.31 (0.89, 1.98)       | 7.21 (1.45, 24.28)      | 0.0000          |
| <b>IL-12p70</b>                      | 0.69 (0.56, 1.86)          | 2.08 (1.64, 3.16)       | 1.64 (0.69, 2.89)       | 0.007           |
| <b>IL-18</b>                         | 8.12 (6.79, 12.69)         | 60.37 (47.53, 90.71)    | 26.71 (8.12, 60.70)     | 0.0000          |
| <b>IL-23</b>                         | 0 (0, 26.50)               | 0 (0, 0)                | 0 (0, 2.70)             | 0.020           |
| <b>IL-27</b>                         | 722.36 (623.47, 1912.30)   | 12195 (0, 41.16)        | 42.84 (0.09, 682.37)    | 0.0004          |
| <b>IL-31</b>                         | 0 (0, 10.72)               | 0 (0, 0)                | 0 (0, 0)                | 0.019           |
| <b>TNF-<math>\alpha</math></b>       | 13.41 (10.61, 16.16)       | 5.55 (3.96, 9.81)       | 10.61 (5.91, 15.23)     | 0.001           |
| <b>IFN-<math>\gamma</math></b>       | 0.85 (0, 7.26)             | 13.83 (8.92, 15.97)     | 7.71 (0.85, 14.63)      | 0.001           |
| <b>Chemokines</b>                    |                            |                         |                         |                 |
| <b>MCP1/CCL2</b>                     | 227.41 (176.95, 514.93)    | 29.63 (20.65, 39.27)    | 124.75 (29.91, 229.76)  | 0.0000          |
| <b>MIP-1<math>\beta</math>/CCL4</b>  | 108.37 (87.92, 205.86)     | 281.03 (241.52, 325.55) | 232.7 (108.37, 291.50)  | 0.001           |
| <b>RANTES/CCL5</b>                   | 4.28 (3.01, 5.42)          | 192.24 (109.27, 260.56) | 15.93 (4.28, 191.87)    | 0.0000          |
| <b>GRO-<math>\alpha</math>/CXCL1</b> | 39.84 (9.14, 65.72)        | 0 (0, 0)                | 0 (0, 39.84)            | 0.0000          |
| <b>IL-8/CXCL8</b>                    | 37.79 (8.72, 124.11)       | 7.81 (0.73, 27.43)      | 24.54 (3.05, 62.73)     | 0.011           |
| <b>IP-10/CXCL10</b>                  | 508.52 (322.78, 1101.51)   | 142.92 (87.49, 245.25)  | 261.95 (143.61, 520.72) | 0.0000          |
| <b>Growth factors</b>                |                            |                         |                         |                 |
| <b>BDNF</b>                          | 1.72 (1.72, 1.72)          | 14.87 (2.55, 37.20)     | 1.94 (1.72, 16.35)      | 0.003           |
| <b>LIF</b>                           | 58.83 (28.08, 83.19)       | 7.45 (4.84, 11.37)      | 24.42 (7.70, 70.94)     | 0.0001          |
| <b>PDGF-BB</b>                       | 27.24 (14.20, 40.75)       | 233.85 (102.06, 614.94) | 48.45 (27.24, 198.34)   | 0.0000          |
| <b>SCF</b>                           | 10.81 (7.19, 19.59)        | 23085 (15.83, 46.81)    | 16.15 (9.57, 30.63)     | 0.014           |
| <b>VEGF-A</b>                        | 659.32 (432.56, 878.48)    | 111.37 (59.76, 254.95)  | 289.96 (112.11, 680.02) | 0.0002          |
| <b>VEGF-D</b>                        | 16.67 (2.28, 42.59)        | 0 (0, 4.53)             | 2.28 (0, 29.97)         | 0.011           |

\*The Kruskal–Wallis test was performed with Benjamini–Hochberg multiple test correction. Median levels, expressed as pg/ml, and interquartile range are reported.

**Table S3.** Cytokine distribution in the two compartments in 20 cirrhotic patients with HCV/HBV infection.

| Cytokines                        | Ascites                    | Plasma                   | Total                   | <i>P value</i> * |
|----------------------------------|----------------------------|--------------------------|-------------------------|------------------|
| <b>Interleukins, TNF and IFN</b> |                            |                          |                         |                  |
| IL-1Ra                           | 25.34 (0, 306.74)          | 497.31 (199.49, 1153.77) | 249.96 (31.82, 814.23)  | 0.017            |
| IL-2                             | 32.57 (23.96, 40.71)       | 11.54 (6.71, 18.68)      | 22.2 (10.22, 37.63)     | 0.012            |
| IL-4                             | 93.73 (79.69, 106.34)      | 12.69 (6.79, 23.77)      | 71.6 (10.79, 93.73)     | 0.001            |
| IL-5                             | 8.52 (5.40, 17.29)         | 0 (0, 6.94)              | 5.35 (0, 15.56)         | 0.017            |
| IL-6                             | 2146.52 (1532.63, 2699.08) | 41.13 (31.63, 86.17)     | 93.14 (38.07, 2124.44)  | 0.0002           |
| IL-10                            | 13.76 (8.26, 24.40)        | 1.33 (0.72, 4.78)        | 5.72 (1.11, 16.09)      | 0.001            |
| IL-12p70                         | 0.84 (0.57, 1.42)          | 3.17 (1.96, 4.90)        | 1.93 (1.01, 3.97)       | 0.010            |
| IL-18                            | 12.12 (7.85, 19.73)        | 80075 (50.73, 90.32)     | 42.45 (12.94, 85.71)    | 0.001            |
| IL-27                            | 238.15 (225.15, 1175.00)   | 89.15 (0, 203.32)        | 180795 (0, 279.01)      | 0.012            |
| IFN- $\gamma$                    | 1.41 (0, 5.43)             | 19.5 (15.49, 32.37)      | 15.44 (1.76, 27.25)     | 0.004            |
| <b>Chemokines</b>                |                            |                          |                         |                  |
| MCP-1/CCL2                       | 248.86 (158.08, 380.58)    | 31.37 (24.25, 39.91)     | 67.27 (1.31, 202.86)    | 0.0000           |
| MIP-1 $\beta$ /CCL4              | 112.72 (94.65, 134.85)     | 275815 (261.72, 298.03)  | 245.44 (118.51, 285.47) | 0.001            |
| RANTES/CCL5                      | 3.04 (2.24, 3.46)          | 195.27 (127.49, 284.06)  | 32.8 (3.21, 205.53)     | 0.0000           |
| Eotaxin/CCL1                     | 30.93 (22.38, 45.51)       | 59735 (50.74, 71.14)     | 50.7 (30.93, 64.40)     | 0.016            |
| GRO- $\alpha$ /CXCL1             | 26.35 (2.58, 49.40)        | (0, 0)                   | (0, 32.33)              | 0.001            |
| IP-10/CXCL10                     | 411.95 (232.72, 930.84)    | 181.86 (111.24, 215.92)  | 208.2 (149.97, 411.95)  | 0.011            |
| <b>Growth factors</b>            |                            |                          |                         |                  |
| BDNF                             | 1.72 (1.72, 1.72)          | 21.99 (9.91, 51.72)      | 6.76 (1.72, 25.34)      | 0.001            |
| LIF                              | 33.27 (21.45, 120.99)      | 7915 (5.65, 18.06)       | 20.72 (7.76, 33.27)     | 0.001            |
| PDGF-BB                          | 27.24 (24.60, 84.47)       | 255775 (167.83, 631.07)  | 138.57 (27.24, 267.67)  | 0.0002           |
| VEGF-A                           | 662.97 (450.37, 938.77)    | 95.39 (81.52, 201.48)    | 233.79 (94.66, 662.97)  | 0.0002           |

\*The Kruskal–Wallis test was performed with Benjamini–Hochberg multiple test correction. Median levels, expressed as pg/ml, and interquartile range are reported.

**Table S4.** Cytokine distribution in the ascites of cirrhotic patients with and without HCV/HBV infection.

|                                      | without HCV/HBV<br>infection | with HCV/HBV<br>infection  | Total                    | <i>P value</i> * |
|--------------------------------------|------------------------------|----------------------------|--------------------------|------------------|
| <b>Interleukins, TNF and IFN</b>     |                              |                            |                          |                  |
| <b>IL-1Ra</b>                        | 25.34 (0, 147.51)            | 25.34 (0, 306.74)          | 25.34 (0, 175.24)        | 0.9334           |
| <b>IL-2</b>                          | 34.64 (27.69, 58.69)         | 32.57 (23.96, 40.71)       | 34.365 (26.90, 56.48)    | 0.9334           |
| <b>IL-4</b>                          | 96.62 (87.72, 118.13)        | 93.73 (79.69, 106.34)      | 96.215 (80.34, 112.48)   | 0.9334           |
| <b>IL-5</b>                          | 16.04 (6.93, 34.61)          | 8.52 (5.40, 17.29)         | 13.565 (5.43, 29.19)     | 0.9334           |
| <b>IL-6</b>                          | 2403.61 (1656.98, 4129.58)   | 2146.52 (1532.63, 2699.08) | 2204.17 (1569.3, 3520.4) | 0.9334           |
| <b>IL-10</b>                         | 21.53 (9.54, 31.56)          | 13.76 (8.26, 24.40)        | 18.93 (8.88, 30.37)      | 0.9334           |
| <b>IL-12p70</b>                      | 0.69 (0.56, 1.86)            | 0.84 (0.57, 1.42)          | 0.78 (0.55, 1.75)        | 0.9334           |
| <b>IL-18</b>                         | 8.12 (6.79, 12.69)           | 12.12 (7.85, 19.73)        | 9.44 (7.10, 16.50)       | 0.9334           |
| <b>IL-27</b>                         | 722.36 (623.47, 1912.30)     | 238.15 (225.15, 1175.00)   | 657.6 (234.59, 1722.28)  | 0.9334           |
| <b>IFN-<math>\gamma</math></b>       | 0.85 (0, 7.26)               | 1.41 (0, 5.43)             | 0.905 (0, 6.88)          | 0.9334           |
| <b>Chemokines</b>                    |                              |                            |                          |                  |
| <b>MCP-1/CCL2</b>                    | 227.41 (176.95, 514.93)      | 248.86 (158.08, 380.58)    | 238.135 (169.39, 433.07) | 0.9334           |
| <b>MIP-1<math>\beta</math>/CCL4</b>  | 108.37 (87.92, 205.86)       | 112.72 (94.65, 134.85)     | 111.795 (90.99, 172.64)  | 0.9334           |
| <b>RANTES/CCL5</b>                   | 4.28 (3.01, 5.42)            | 3.04 (2.24, 3.46)          | 3.305 (2.77, 4.72)       | 0.9334           |
| <b>Eotaxin/CCL1</b>                  | 31.91 (28.16, 40.52)         | 30.93 (22.38, 45.51)       | 31.725 (26.37, 45.09)    | 0.9334           |
| <b>GRO-<math>\alpha</math>/CXCL1</b> | 39.84 (9.14, 65.72)          | 26.35 (2.58, 49.40)        | 39.03 (2.69, 63.90)      | 0.9334           |
| <b>IP-10/CXCL10</b>                  | 508.52 (322.78, 1101.51)     | 411.95 (232.72, 930.84)    | 477.695 (294.40, 992.48) | 0.9334           |
| <b>Growth factors</b>                |                              |                            |                          |                  |
| <b>BDNF</b>                          | 1.72 (1.72, 1.72)            | 1.72 (1.72, 1.72)          | 1.72 (1.72, 1.72)        | 0.9334           |
| <b>LIF</b>                           | 58.83 (28.08, 83.19)         | 33.27 (21.45, 120.99)      | 45.995 (24.11, 87.43)    | 0.9334           |
| <b>PDGF-BB</b>                       | 27.24 (14.20, 40.75)         | 27.24 (24.60, 84.47)       | 27.24 (19.08, 44.35)     | 0.9334           |
| <b>VEGF-A</b>                        | 659.32 (432.56, 878.48)      | 662.97 (450.37, 938.77)    | 661.145 (422.79, 904.68) | 0.9334           |

\*The Kruskal–Wallis test was performed with Benjamini–Hochberg multiple test correction. Median levels, expressed as pg/ml, and interquartile range are reported

**Table S5.** Cytokine distribution in the plasma compartment of cirrhotic patients with and without HCV/HBV infection.

|                                      | without HCV/HBV<br>infection | with HCV/HBV<br>infection | Total                    | <i>P value</i> * |
|--------------------------------------|------------------------------|---------------------------|--------------------------|------------------|
| <b>Interleukins, TNF and IFN</b>     |                              |                           |                          |                  |
| <b>IL-1Ra</b>                        | 364.25 (159.52, 696.16)      | 497.31 (199.49, 1153.77)  | 403.47 (176.18, 938.86)  | 0.9334           |
| <b>IL-2</b>                          | 11.54 (6.83, 16.41)          | 11.54 (6.71, 18.68)       | 11.54 (6.71, 17.80)      | 0.9334           |
| <b>IL-4</b>                          | 8.69 (4.78, 22.83)           | 12.69 (6.792, 23.77)      | 11.32 (5.54, 23.30)      | 0.9334           |
| <b>IL-5</b>                          | 0 (0, 4.16)                  | 0 (0, 6.94)               | 0 (0, 6.94)              | 0.9334           |
| <b>IL-6</b>                          | 41.51 (22.47, 71.31)         | 41.13 (31.63, 86.17)      | 41.51 (25.93, 75.48)     | 0.9334           |
| <b>IL-10</b>                         | 1.31 (0.89, 1.98)            | 1.33 (0.72, 4.78)         | 1.31 (0.72, 2.74)        | 0.9334           |
| <b>IL-12p70</b>                      | 2.08 (1.64, 3.16)            | 3.17 (1.96, 4.90)         | 2.455 (1.81, 3.88)       | 0.9334           |
| <b>IL-18</b>                         | 60.37 (47.53, 90.71)         | 80.075 (50.73, 90.32)     | 68.82 (48.18, 90.65)     | 0.9334           |
| <b>IL-27</b>                         | 12.195 (0, 41.16)            | 89.15 (0, 203.32)         | 21.02 (0, 137.31)        | 0.9334           |
| <b>IFN-<math>\gamma</math></b>       | 13.83 (8.92, 15.97)          | 19.5 (15.49, 32.37)       | 15.54 (11.20, 24.93)     | 0.9334           |
| <b>Chemokines</b>                    |                              |                           |                          |                  |
| <b>MCP-1/CCL2</b>                    | 29.635 (20.65, 39.27)        | 31.37 (24.25, 39.91)      | 31.195 (21.20, 39.91)    | 0.9334           |
| <b>MIP-1<math>\beta</math>/CCL4</b>  | 281.03 (241.52, 325.55)      | 275.815 (261.72, 298.03)  | 280.92 (245.0, 305.01)   | 0.9334           |
| <b>RANTES/CCL5</b>                   | 192.245 (109.27, 260.56)     | 195.275 (127.49, 284.06)  | 192.245 (113.68, 284.06) | 0.9334           |
| <b>Eotaxin/CCL1</b>                  | 43.105 (33.66, 58.95)        | 59.735 (50.74, 71.14)     | 53.475 (37.13, 68.22)    | 0.9334           |
| <b>GRO-<math>\alpha</math>/CXCL1</b> | 0 (0, 0)                     | 0 (0, 0)                  | 0 (0, 0)                 | 0.9334           |
| <b>IP-10/CXCL10</b>                  | 142.92 (87.49, 245.25)       | 181.865 (111.24, 215.92)  | 163.805 (96.80, 238.93)  | 0.9334           |
| <b>Growth factors</b>                |                              |                           |                          |                  |
| <b>BDNF</b>                          | 14.875 (2.5, 37.20)          | 21.99 (9.91, 51.72)       | 16.42 (6.85, 44.0)       | 0.9334           |
| <b>LIF</b>                           | 7.45 (4.84, 11.37)           | 7.915 (5.65, 18.06)       | 7.73 (5.21, 14.78)       | 0.9334           |
| <b>PDGF-BB</b>                       | 233.85 (102.06, 614.94)      | 255.775 (167.83, 631.07)  | 255.775 (150.68, 628.51) | 0.9334           |
| <b>VEGF-A</b>                        | 111.37 (59.76, 254.95)       | 95.395 (81.52, 201.48)    | 103.38 (63.46, 240.5963) | 0.9334           |

\*The Kruskal–Wallis test was performed with Benjamini–Hochberg multiple test correction. Median levels, expressed as pg/ml, and interquartile range are reported
